# Supplementary material
Source: publisher figshare collection journal article supplement (https://sage.figshare.com/ndownloader/files/21786588)
Supplement: Supplementary file 1 [file 21786588]

# **Socioeconomic Life Course Models and Oral Health: A Longitudinal Analysis**

R.K. Celeste, H.S. Eyjólfsdóttir, C. Lennartsson, and J. Fritzell

## **Appendix Methods: Statistical analyses**

Two absolute fit indices were assessed, values under 0.05 for Root Mean Square Error of Approximation (RMSEA) or below 1.0 for Weighted Root Mean Square Residual (WRMR) suggest close approximate (adequate) fit. The Comparative Fit Index (CFI) and the Tucker-Lewis index (TLI) represent incremental fit and values  $>0.95$  are indicative of good fit. Standardized coefficients (SC) are scaled as standard-deviations (Std) for both independent and dependent variables and were interpreted according to Kline (1994), where an SC of about 0.10 indicates a small effect, about 0.30 a medium, and  $> 0.50$  a strong effect. A coefficient of 0.50 means that a change in 1 Std in the independent variable is associated with 0.50 Std change in the outcome. Direct and indirect effects were obtained with “indirect” command in the software.

Sensitivity analysis was carried out, changing the cut-off-point of self-reported oral health. We also calculated prevalence and incidence of teeth in good conditions (code 1 versus all others) but results were much similar (see Appendix Tables 3 and 4), although not significant due to smaller sample (starting only with people with teeth in good conditions for incidence analysis).

Kline P. 1994. An easy guide to factor analysis. London (UK): Routledge.

## Appendix Tables:

**Appendix Table 1-** Prevalence of people losing all or almost all teeth by two socioeconomic variables in two Swedish cohorts.

| Trajectories from childhood up to survey year | Prevalence in survey 1974 |      |          | Prevalence in survey 1991 |     |          | Prevalence in survey 2011 |     |          |
|-----------------------------------------------|---------------------------|------|----------|---------------------------|-----|----------|---------------------------|-----|----------|
|                                               | %                         | N    | p-value* | %                         | N   | p-value* | %                         | N   | p-value* |
| Cohort 1925–34 / mean age                     | 44 years                  |      |          | 61 years                  |     |          | 81 years                  |     |          |
| Persistently lower                            | 35.5                      | 262  | <0.01    | 42.8                      | 243 | <0.01    | 44.5                      | 182 | <0.01    |
| Downwardly mobile                             | 29.0                      | 69   |          | 30.6                      | 85  |          | 30.0                      | 70  |          |
| Upwardly mobile                               | 20.2                      | 297  |          | 26.3                      | 209 |          | 22.0                      | 109 |          |
| Persistently higher                           | 7.9                       | 252  |          | 11.6                      | 181 |          | 14.3                      | 105 |          |
| Total                                         | 21.9                      | 880  |          | 28.7                      | 718 |          | 30.3                      | 466 |          |
| Cohort 1944–53 / mean age                     | 26 year                   |      |          | 43 years                  |     |          | 63 years                  |     |          |
| Persistently lower                            | 3.7                       | 324  | <0.01    | 6.9                       | 261 | <0.01    | 8.7                       | 229 | <0.01    |
| Downwardly mobile                             | 1.1                       | 189  |          | 2.5                       | 161 |          | 3.4                       | 146 |          |
| Upwardly mobile                               | 0.8                       | 260  |          | 1.7                       | 239 |          | 5.0                       | 139 |          |
| Persistently higher                           | 0.3                       | 365  |          | 1.0                       | 298 |          | 2.0                       | 201 |          |
| Total                                         | 1.5                       | 1138 |          | 3.0                       | 959 |          | 5.0                       | 715 |          |
| SES in childhood                              |                           |      |          |                           |     |          |                           |     |          |
| Cohort 1925–34 / mean age                     | 44 years                  |      |          | 61 years                  |     |          | 81 years                  |     |          |
| Lower                                         | 27.4                      | 559  | <0.01    | 36.2                      | 473 | <0.01    | 39.0                      | 305 | <0.01    |
| Middle                                        | 16.8                      | 208  |          | 25.4                      | 173 |          | 24.1                      | 108 |          |
| Higher                                        | 4.4                       | 113  |          | 5.1                       | 99  |          | 19.4                      | 72  |          |
| Total                                         | 21.9                      | 880  |          | 29.5                      | 745 |          | 32.7                      | 485 |          |
| Cohort 1944–53 / mean age                     | 26 year                   |      |          | 43 years                  |     |          | 63 years                  |     |          |
| Lower                                         | 2.4                       | 585  | 0.01     | 4.5                       | 508 | <0.01    | 8.8                       | 374 | <0.01    |
| Middle                                        | 0.7                       | 274  |          | 2.5                       | 238 |          | 5.2                       | 172 |          |
| Higher                                        | 0.4                       | 280  |          | 0.9                       | 235 |          | 0.6                       | 176 |          |
| Total                                         | 1.5                       | 1139 |          | 3.2                       | 981 |          | 6.0                       | 722 |          |

\*p-values for trend for SES in childhood

**Appendix Table 2** - Measurement model (confirmatory factor analysis) standardized estimates for latent variables with residual variance (uniqueness) and residual correlations.

| Latent Factors                       | Items                     | Cohort 1925-34 |            | Cohort 1944-53 |            |
|--------------------------------------|---------------------------|----------------|------------|----------------|------------|
|                                      |                           | Std Estimate   | uniqueness | Std Estimate   | uniqueness |
| Tooth loss in young/mid adulthood BY | Tooth Conditions 68       | 0.90           | 0.20       | 0.68           | 0.54       |
|                                      | Tooth Conditions 74       | 0.93           | 0.14       | 0.87           | 0.25       |
| Tooth loss in mid/late adulthood BY  | Tooth Conditions 81       | 0.96           | 0.08       | 0.84           | 0.29       |
|                                      | Tooth Conditions 91       | 0.96           | 0.08       | 0.87           | 0.24       |
| Tooth loss in late adulthood/life BY | Tooth Conditions 00       | 0.96           | 0.07       | 0.92           | 0.15       |
|                                      | Tooth Conditions 10       | 0.87           | 0.24       | 0.81           | 0.34       |
| SES childhood BY                     | Economic Hardship         | 0.38           | 0.85       | 0.38           | 0.86       |
|                                      | Father occupational Class | 0.68           | 0.55       | 0.74           | 0.46       |
|                                      | Father Education          | 0.85           | 0.27       | 0.87           | 0.25       |
|                                      | Mather Education          | 0.72           | 0.48       | 0.75           | 0.44       |
| SES in young/mid adulthood BY        | Occupational Class 68     | 0.66           | 0.56       | 0.48           | 0.86       |
|                                      | Occupational Class 74     | 0.69           | 0.52       | 0.69           | 0.82       |
|                                      | Cash Margin 68            | 0.45           | 0.80       | 0.38           | 0.77       |
|                                      | Cash Margin 74            | 0.48           | 0.77       | 0.42           | 0.52       |
| SES in mid/late adulthood BY         | Occupational Class 81     | 0.67           | 0.55       | 0.82           | 0.32       |
|                                      | Occupational Class 91     | 0.65           | 0.58       | 0.91           | 0.18       |
|                                      | Cash Margin 81            | 0.46           | 0.79       | 0.47           | 0.78       |
|                                      | Cash Margin 91            | 0.48           | 0.77       | 0.54           | 0.71       |
| SES in late adulthood/life BY        | Occupational Class 00     | 0.90           | 0.19       | 0.68           | 0.50       |
|                                      | Occupational Class 10     | 0.86           | 0.27       | 0.71           | 0.54       |
|                                      | Cash Margin 00            | 0.67           | 0.55       | 0.26           | 0.93       |
|                                      | Cash Margin 10            | 0.67           | 0.56       | 0.27           | 0.93       |
| Residual correlations                |                           |                |            |                |            |
| Cash Margin 00 WITH                  | Cash Margin 10            |                |            | 0.46           |            |
| Cash Margin 68 WITH                  | Cash Margin 74            | 0.42           |            | 0.26           |            |
| Cash Margin 81 WITH                  | Cash Margin 74            |                |            | 0.40           |            |
| Cash Margin 91 WITH                  | Cash Margin 81            | 0.58           |            | 0.46           |            |
| Occupational Class 74 WITH           | Occupational Class 68     | 0.64           |            |                |            |
| Occupational Class 91 WITH           | Occupational Class 81     | 0.64           |            |                |            |
| Occupational Class 10 WITH           | Occupational Class 00     |                |            | 0.76           |            |
| Model Fit                            |                           |                |            |                |            |
| CFI                                  |                           | 0.99           |            | 0.97           |            |
| TLI                                  |                           | 0.98           |            | 0.96           |            |
| RMSEA                                |                           | 0.05           |            | 0.05           |            |
| WRMR                                 |                           | 1.61           |            | 1.47           |            |

**Appendix Table 3** – Incidence of teeth not in good conditions by two socioeconomic variables in two Swedish cohorts.

|                                                    | Incidence from 1968 up to<br>1974 |     |          | Incidence from 1981 up to<br>1991 |     |          | Incidence from 2000 up to<br>2011 |     |          |
|----------------------------------------------------|-----------------------------------|-----|----------|-----------------------------------|-----|----------|-----------------------------------|-----|----------|
| Trajectories from Childhood up to last survey year | %                                 | N   | p-value* | %                                 | N   | p-value* | %                                 | N   | p-value* |
| Cohort 1925-34 / mean age in the period            | 38 to 44<br>years                 |     |          | 51 to 61 years                    |     |          | 70 to 81<br>years                 |     |          |
| Persistently lower                                 | 51.9                              | 81  | 0.31     | 56.9                              | 51  | 0.20     | 72.7                              | 44  | 0.31     |
| Downwardly mobile                                  | 58.3                              | 24  |          | 70.6                              | 17  |          | 66.7                              | 12  |          |
| Upwardly mobile                                    | 42.7                              | 136 |          | 42.6                              | 47  |          | 60.0                              | 35  |          |
| Persistently higher                                | 43.1                              | 116 |          | 49.1                              | 55  |          | 50.0                              | 22  |          |
| Total                                              | 45.9                              | 357 |          | 51.8                              | 170 |          | 63.7                              | 113 |          |
| Cohort 1944-53 / mean age in the period            | 20 to 26<br>years                 |     |          | 33 to 43<br>years                 |     |          | 52 to 63<br>years                 |     |          |
| Persistently lower                                 | 41.8                              | 194 | <0.01    | 47.3                              | 112 | 0.19     | 35.3                              | 68  | 0.69     |
| Downwardly mobile                                  | 39.9                              | 143 |          | 36.9                              | 84  |          | 42.2                              | 45  |          |
| Upwardly mobile                                    | 27.2                              | 202 |          | 38.9                              | 108 |          | 39.5                              | 38  |          |
| Persistently higher                                | 25.5                              | 302 |          | 34.6                              | 165 |          | 31.9                              | 69  |          |
| Total                                              | 32.1                              | 841 |          | 39.0                              | 469 |          | 36.4                              | 220 |          |
| Socioeconomic Position in Childhood                | 38 to 44<br>years                 |     |          | 51 to 61 years                    |     |          | 70 to 81<br>years                 |     |          |
| Cohort 1925-34 / mean age in the period            | 38 to 44<br>years                 |     |          | 51 to 61 years                    |     |          | 70 to 81<br>years                 |     |          |
| Lower                                              | 46.1                              | 217 | 0.99     | 47.1                              | 104 | 0.47     | 67.5                              | 80  | 0.44     |
| Middle                                             | 45.5                              | 88  |          | 57.1                              | 49  |          | 52.4                              | 21  |          |
| Higher                                             | 46.2                              | 52  |          | 45.8                              | 24  |          | 64.3                              | 14  |          |
| Total                                              | 45.9                              | 357 |          | 49.7                              | 177 |          | 64.4                              | 115 |          |
| Cohort 1944-53 / mean age in the period            | 20 to 26<br>years                 |     |          | 33 to 43<br>years                 |     |          | 52 to 63<br>years                 |     |          |
| Lower                                              | 34.3                              | 397 | <0.01    | 42.2                              | 225 | 0.12     | 36.8                              | 106 | 0.98     |
| Middle                                             | 37.4                              | 211 |          | 36.3                              | 124 |          | 35.3                              | 51  |          |
| Higher                                             | 23.5                              | 234 |          | 31.6                              | 136 |          | 36.5                              | 63  |          |
| Total                                              | 32.1                              | 842 |          | 37.7                              | 485 |          | 36.4                              | 220 |          |

\* chi-square test p-values

Note: we kept only people with teeth in good conditions at baseline year

**Appendix Table 4** – Prevalence of people with teeth not in good conditions by two socioeconomic variables in two Swedish cohorts

| Trajectories from Childhood up to survey year | Prevalence in 1974 |       |          | Prevalence in 1991 |     |          | Prevalence in 2011 |     |          |
|-----------------------------------------------|--------------------|-------|----------|--------------------|-----|----------|--------------------|-----|----------|
|                                               | %                  | N     | p-value* | %                  | N   | p-value* | %                  | N   | p-value* |
| Cohort 1925-34 / mean age                     | 44 years           |       |          | 61 years           |     |          | 81 years           |     |          |
| Persistently lower                            | 76.0               | 262   | 0.02     | 87.2               | 243 | 0.01     | 87.9               | 182 | 0.02     |
| Downwardly mobile                             | 78.3               | 69    |          | 87.1               | 85  |          | 88.6               | 70  |          |
| Upwardly mobile                               | 67.7               | 297   |          | 80.4               | 209 |          | 79.8               | 109 |          |
| Persistently higher                           | 65.9               | 252   |          | 76.2               | 181 |          | 75.2               | 105 |          |
| Total                                         | 70.5               | 880   |          | 82.5               | 718 |          | 83.3               | 466 |          |
| Cohort 1944-53 / mean age                     | 26 year            |       |          | 43 years           |     |          | 63 years           |     |          |
| Persistently lower                            | 55.6               | 324   | <0.01    | 68.2               | 261 | 0.05     | 73.8               | 229 | 0.24     |
| Downwardly mobile                             | 47.6               | 189   |          | 60.3               | 161 |          | 72.6               | 146 |          |
| Upwardly mobile                               | 36.5               | 260   |          | 59.4               | 239 |          | 73.4               | 139 |          |
| Persistently higher                           | 32.9               | 365   |          | 57.1               | 298 |          | 65.7               | 201 |          |
| Total                                         | 42.6               | 1138  |          | 61.2               | 959 |          | 71.2               | 715 |          |
| Socioeconomic Position in Childhood           |                    |       |          |                    |     |          |                    |     |          |
| Cohort 1925-34 / mean age                     | 44 years           |       |          | 61 years           |     |          | 81 years           |     |          |
| Lower                                         | 71.6               | 559   | 0.43     | 83.51              | 473 | 0.19     | 85.57              | 305 | 0.35     |
| Middle                                        | 70.2               | 208   |          | 82.08              | 173 |          | 79.63              | 108 |          |
| Higher                                        | 65.5               | 113   |          | 75.76              | 99  |          | 83.33              | 72  |          |
| Total                                         | 70.5               | 880   |          | 82.15              | 745 |          | 83.92              | 485 |          |
| Cohort 1944-53 / mean age                     | 26 year            |       |          | 43 years           |     |          | 63 years           |     |          |
| Lower                                         | 47.01              | 585   | 0.01     | 63.58              | 508 | 0.05     | 74.06              | 374 | 0.05     |
| Middle                                        | 44.89              | 274.0 |          | 59.66              | 238 |          | 73.26              | 172 |          |
| Higher                                        | 31.07              | 280.0 |          | 54.47              | 235 |          | 64.2               | 176 |          |
| Total                                         | 42.58              | 1139  |          | 60.45              | 981 |          | 71.47              | 722 |          |

\* chi-square test p-values
